# Supplementary material for: Differences in Incidence and Risk Factors of Infertility Between Couples Who Desire a First and Second Child: A Prospective Cohort Study
Source: Research Square preprint supplement (doi:10.21203/rs.3.rs-1213805/v1), 2022-01-11
Supplement: Supplementary file 1 [file 27a72bea90b9f472cee77fc3.xlsx]

## Sheet: Sheet1
Table 2 Medical history of men all included
	All couples			First child				Second child
	Fertility (N=1814)	Infertilitya (N=374)		Fertility （N=1484）	infertilitya (N=355)	P value c		Fertility （N=324）	infertilitya (N=14)	P value c
	n b (%)	n b(%)		n b (%)	n b(%)			n b (%)	n b(%)
Genital tract infection history
Neisseria gonorrhoeae
No	1682(99.94）	346(100.00)		1362(99.93)	327(100.00)	1		313(100.00)	14(100.00)	NA
Yes	1(0.06)	0		1(0.07)	0(0.00)			0(0.00)	0(0.00)
TP
No	1683(100.00)	346(100.00)		1363(100.00)	327(100.00)	NA		313(100.00)	14(100.00)	NA
Yes	0	0		0(0.00)	0(0.00)			0(0.00)	0(0.00)
Herpes virus
No	1681(99.88)	346(100.00)		1362(99.93)	327(100.00)	1		312(99.68)	14(100.00)	1
Yes	2(0.12)	0		1(0.07)	0(0.00)			1(0.32)	0(0.00)
Condyloma acuminata
No	1679(99.76)	345(99.71)		1359(99.71)	326(99.69)	1		345(99.711)	14(100.00)	1
Yes	4(0.24)	1(0.29)		4(0.29)	1(0.31)			1(0.289)	0(0.00)
Mycoplasma genitalium
No	1648(97.92)	328(94.80)		1331(97.65)	310(94.80)	0.009		310(99.04)	13(92.86)	0.161
Yes	35(2.08)	18(5.20）		32(2.35）	17(5.20)			3(0.96）	1(7.14)
Chlamydia genitalium
No	1658(98.51)	267(96.04)		1340(98.31)	314(96.02)	0.017		311(99.36)	14(100.00)	1
Yes	25(1.49)	13(3.76)		23(1.69）	13(3.98)			2(0.64)	0(0.00)
HPV
No	1682(99.94)	345(99.71)		1362(99.93)	326(99.69)	0.35		313(100.00)	14(100.00)	NA
Yes	1(0.06)	1(0.29)		1(0.07)	1(0.31)			0(0.00)	0(0.00)
Prostatitis
No	1627(97.66)	321(94.69)		1312(97.35)	304(95.00)	0.05		308(99.35)	13(92.86)	0.124
Yes	39(2.34)	18(5.31)		37(2.74)	16(5.00)			2(0.65)	1(7.14)
TP,Treponema pallidum antibody;HPV, High-risk human papillomavirus.
a Faliure to conceive after regular unprotected sexual intercourse for 1 year.
b The sum does not necessarily equal the sample size for all variables because of missing data.
c Pearson's χ2 test.
